# Supplementary material for: Compared to histamine-2 receptor antagonist, proton pump inhibitor induces stronger oral-to-gut microbial transmission and gut microbiome alterations: a randomised controlled trial
Source: PubMed Central journal article supplement — Gut. 2023 Nov 22;73(7):1087–97. doi: 10.1136/gutjnl-2023-330168 (PMC11187400; doi:10.1136/gutjnl-2023-330168), 2023-11-22
Supplement: gutjnl-2023-330168supp007.pdf [file gutjnl-2023-330168supp007.pdf]

A

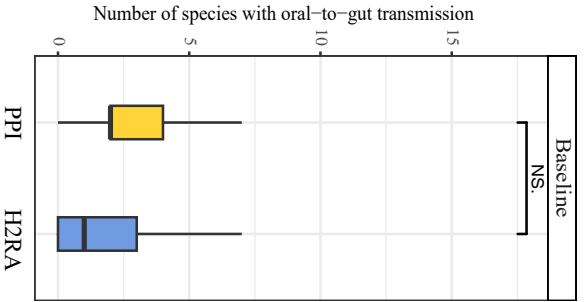

Total abundance of the species with oral-to-gut transmission in the gut

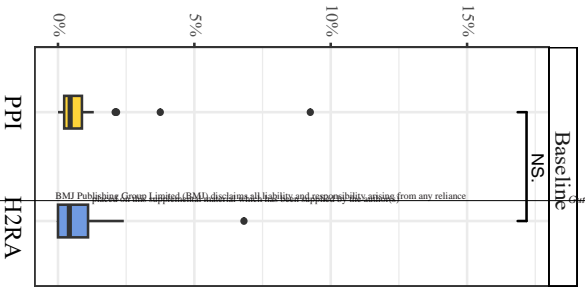

Supplemental material

BMJ Publishing Group Limited (BMJ) disclaims all liability and responsibility arising from any reliance placed on the Supplemental material that has been supplied by the author(s).

B

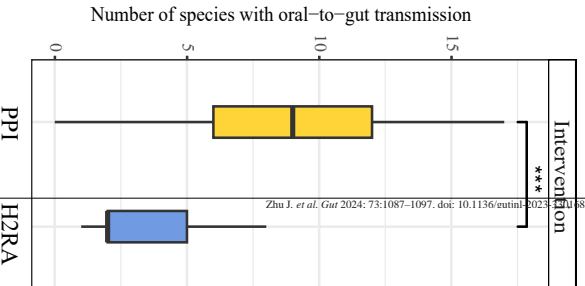

Total abundance of the species with oral-to-gut transmission in the gut

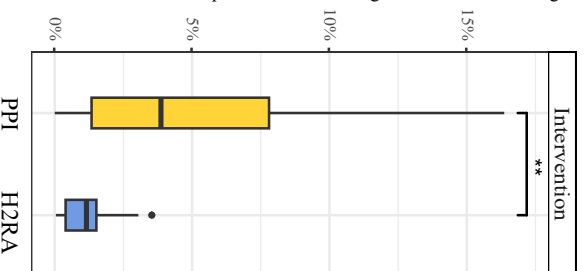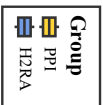

Zhu J. et al. Gut 2024; 73:1087-1097. doi: 10.1136/gut-2023-035188
