# Supplementary figures and images for: Compared to histamine-2 receptor antagonist, proton pump inhibitor induces stronger oral-to-gut microbial transmission and gut microbiome alterations: a randomised controlled trial
Source: PubMed Central journal article supplement — Gut. 2023 Nov 22;73(7):1087–97. doi: 10.1136/gutjnl-2023-330168 (PMC11187400; doi:10.1136/gutjnl-2023-330168), 2023-11-22

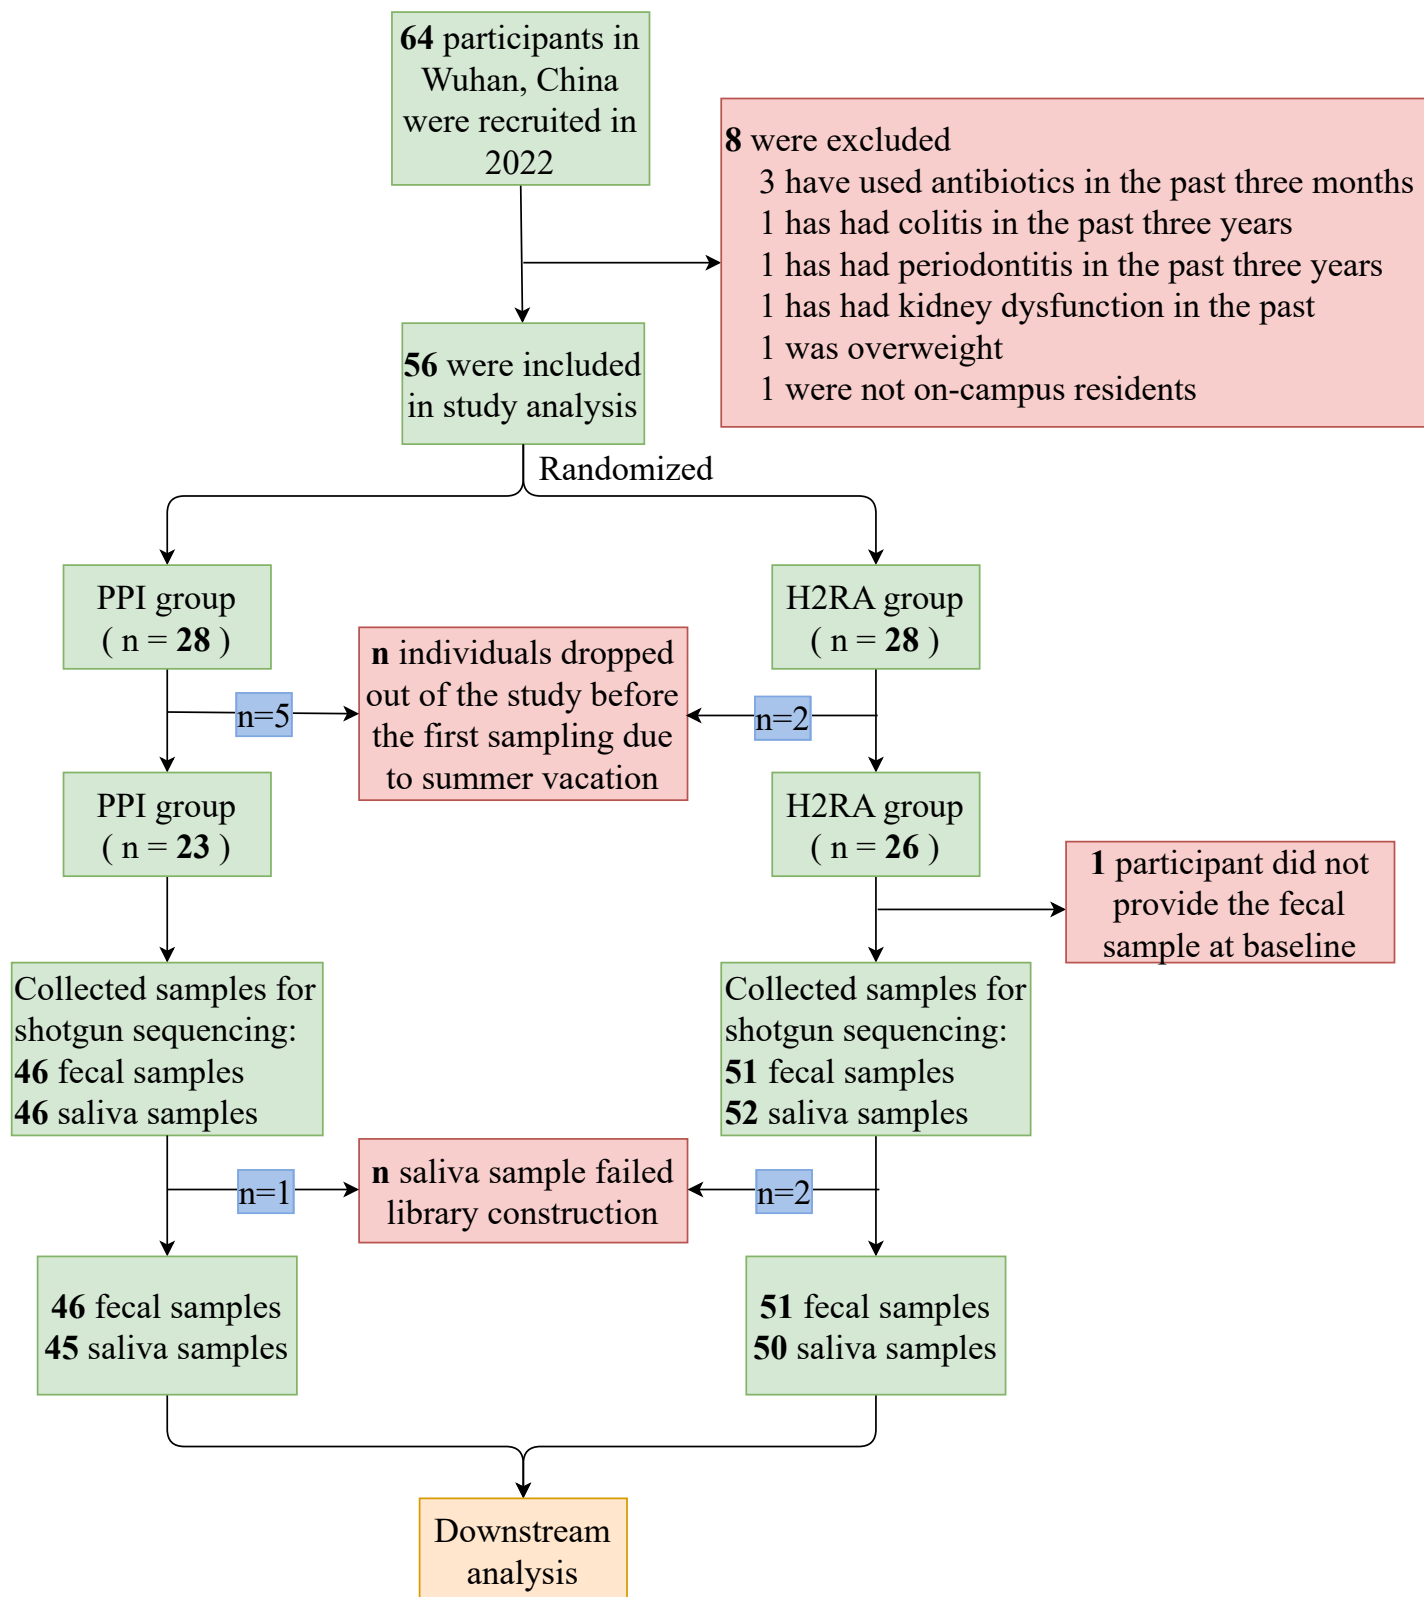

Supplement: gutjnl-2023-330168supp004.pdf [file gutjnl-2023-330168supp004.pdf]

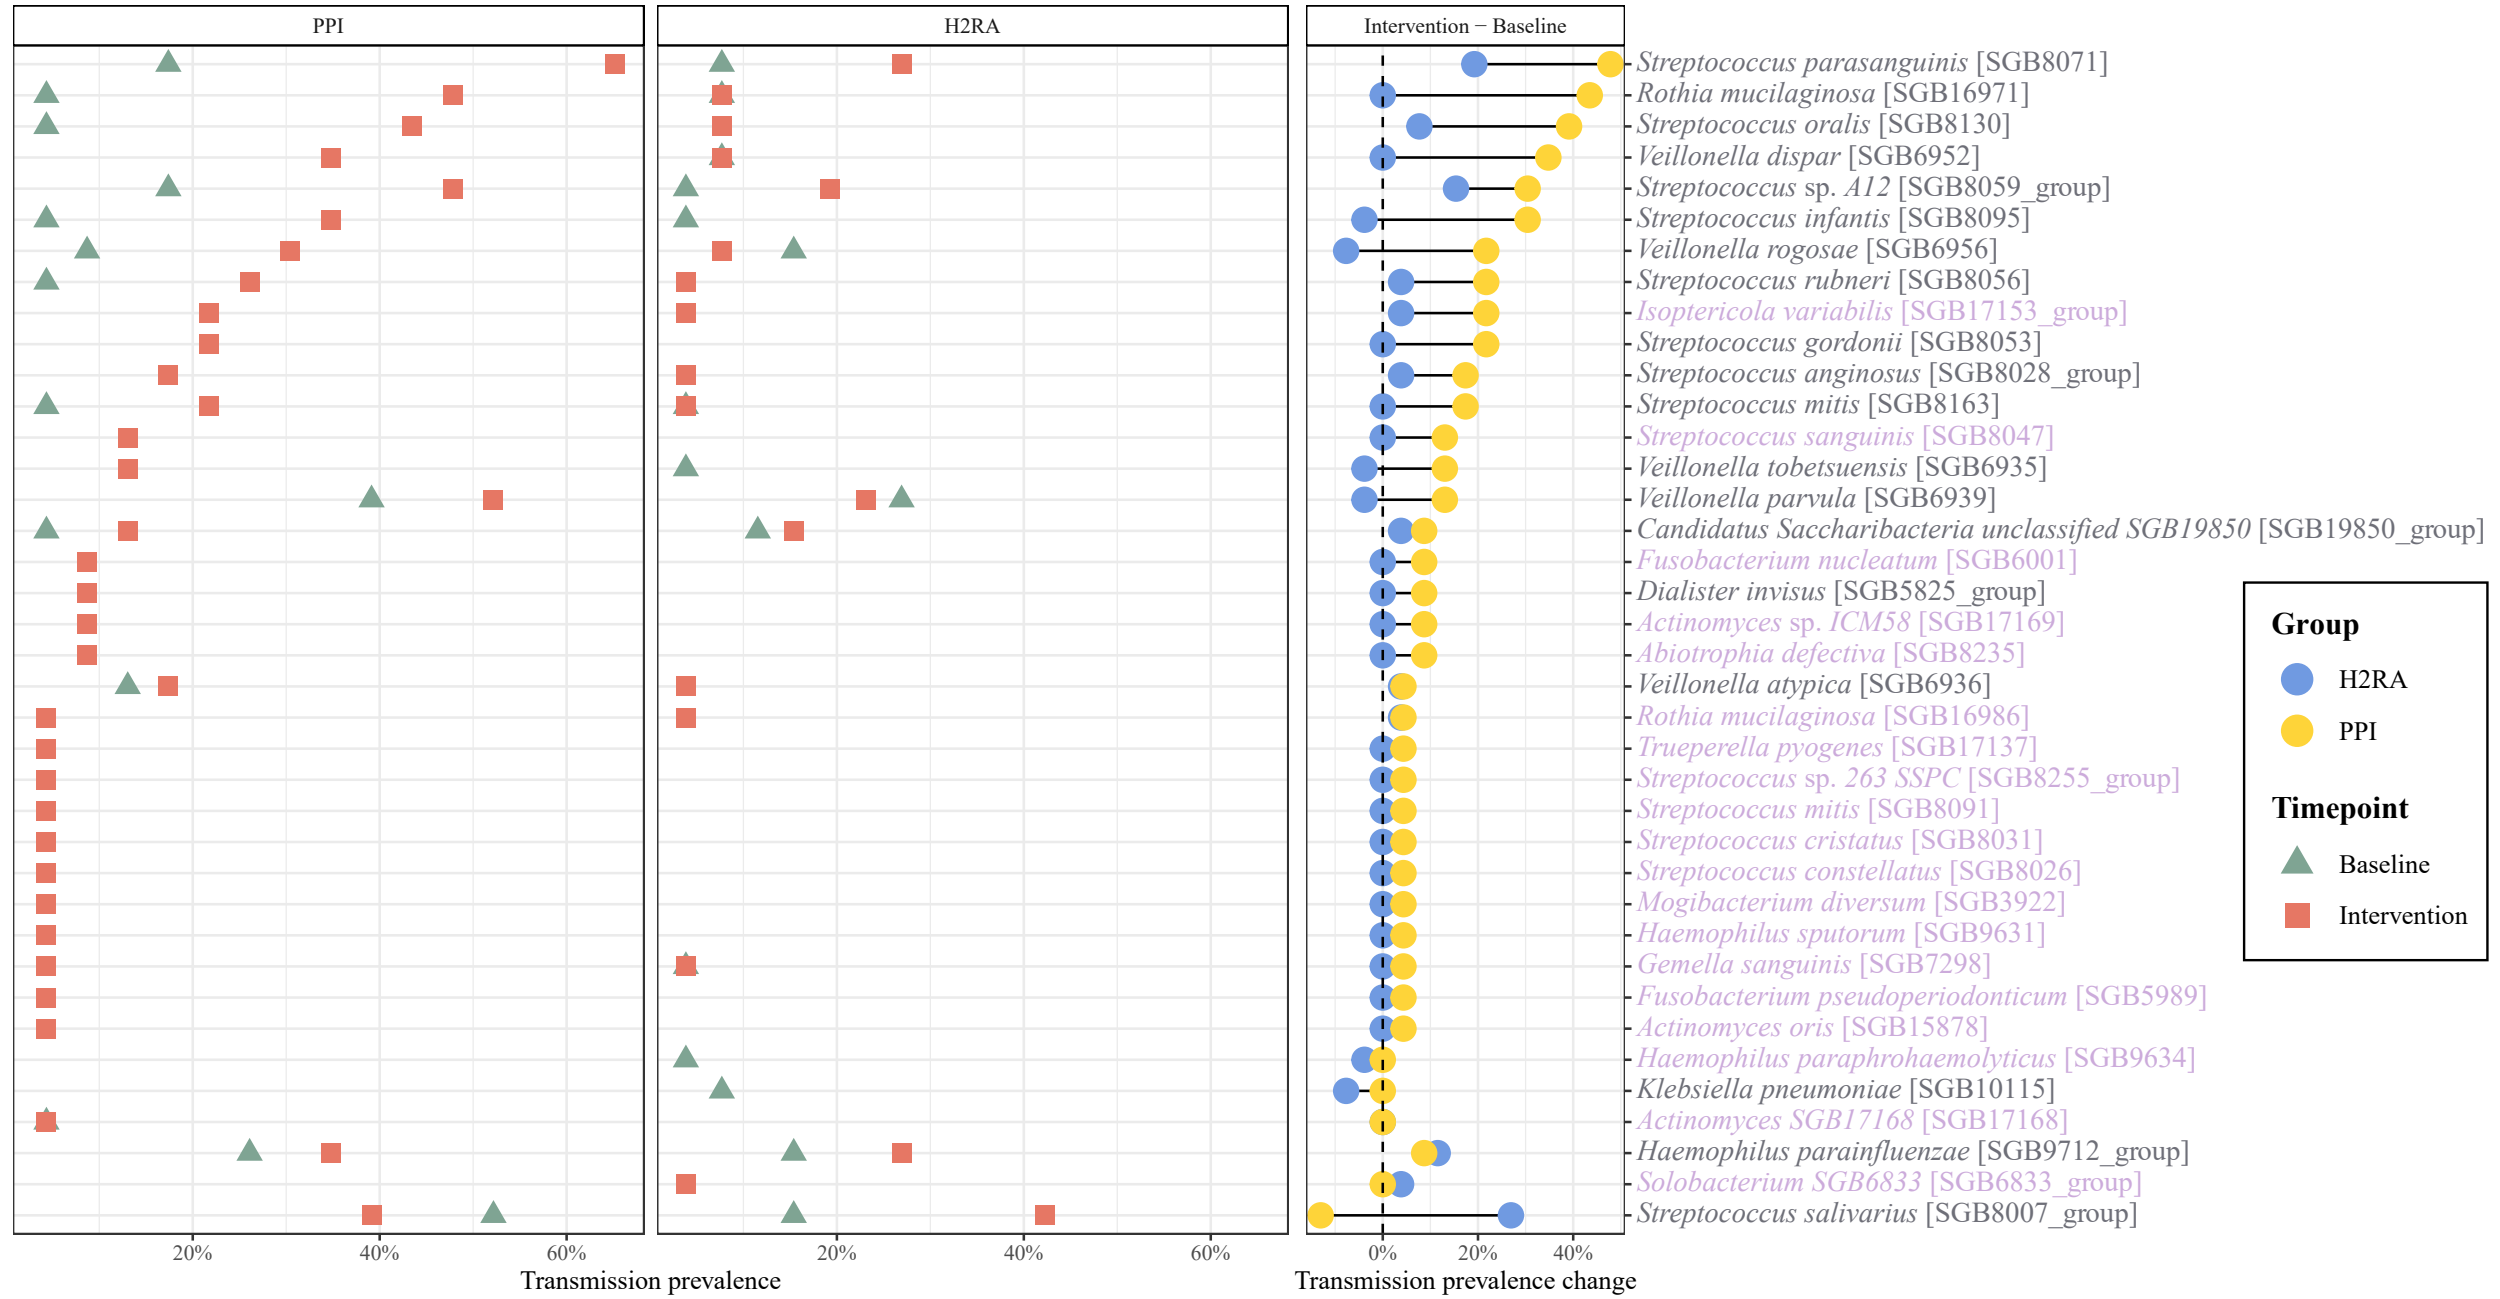

Supplement: gutjnl-2023-330168supp005.pdf [file gutjnl-2023-330168supp005.pdf]

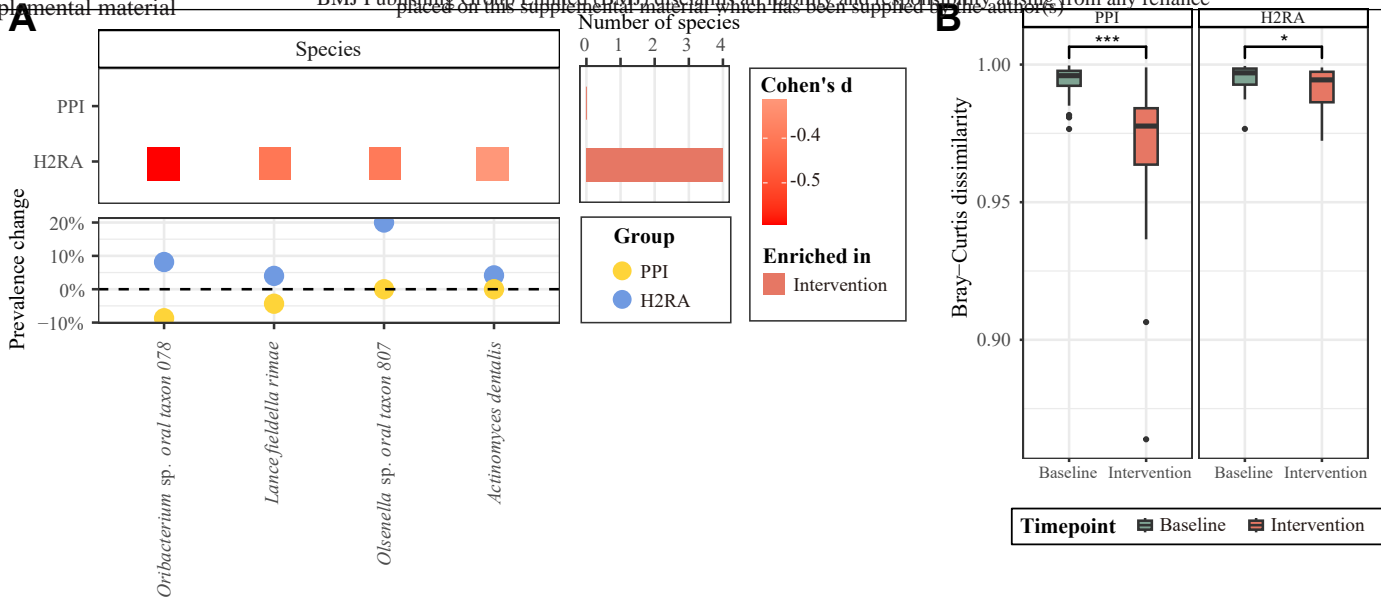

Supplement: gutjnl-2023-330168supp006.pdf [file gutjnl-2023-330168supp006.pdf]
